# Supplementary material for: In situ preparation of compounds using silanized mPEG inspired by talc-like structures
Source: Royal Society of Chemistry journal article supplement (doi:10.1039/d2dt04016f), 2023-01-01
Supplement: d2dt04016f1.pdf [file d2dt04016f1.pdf]

## Supplementary Information

### In-situ preparation of compounds using silanized mPEG inspired by talc-like structures

Liva Dzene,<sup>\*a</sup> Anne-Sophie Schuller,<sup>b</sup> Frédéryck Tidas,<sup>b</sup> Séverinne Rigolet,<sup>a</sup> Jocelyne Brendlé<sup>a</sup> and Christelle Delaite<sup>b</sup>

<sup>a</sup> Institut de Science des Matériaux de Mulhouse CNRS UMR 7361, Université de Haute-Alsace, Université de Strasbourg, 3b rue Alfred Werner, 68093 Mulhouse Cedex, France.

<sup>b</sup> Laboratoire de Photochimie et d'Ingénierie Macromoléculaires - EA4567, Université de Haute Alsace, Université de Strasbourg, 3b rue Alfred Werner, 68093 Mulhouse Cedex, France.

[\\*liva.dzene@uha.fr](mailto:liva.dzene@uha.fr)

**Table S1.** Quantities of reactants used in the synthesis.

| Sample label  | Source of Si  | m of source of Si, g | m of source of Mg, g | Volume ethanol, mL | Volume 1M NaOH, mL |
|---------------|---------------|----------------------|----------------------|--------------------|--------------------|
| <b>FTI-01</b> | TEOS          | 4.999                | 4.658                | 125                | 36                 |
| <b>FTI-05</b> | PEG750-IPTES  | 2.180                | 0.446                | 125                | 20                 |
| <b>FTI-06</b> | PEG1900-IPTES | 2.078                | 0.187                | 125                | 20                 |
| <b>FTI-09</b> | PEG500-IPTES  | 4.478                | 1.145                | 125                | 20                 |
| <b>FTI-14</b> | PEG350-IPTES  | 2.410                | 0.740                | 125                | 15                 |

**Table S2.** SEM images of compounds prepared using TEOS, PEG350-IPTES, PEG500-IPTES and PEG750-IPTES as silicon sources.

| Magnification<br>Silicon source | x10,000                                                                                                                                                                                                                                                                                                                 | x50,000                                                                                                                                                                                                                                                                                                         |
|---------------------------------|-------------------------------------------------------------------------------------------------------------------------------------------------------------------------------------------------------------------------------------------------------------------------------------------------------------------------|-----------------------------------------------------------------------------------------------------------------------------------------------------------------------------------------------------------------------------------------------------------------------------------------------------------------|
| TEOS                            | 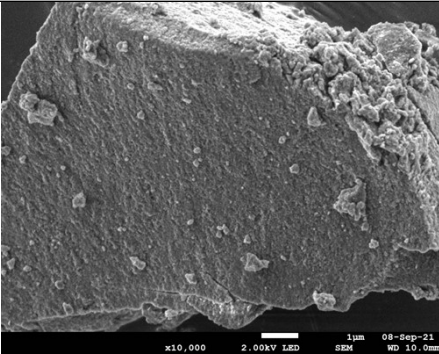 <p>SEM image of TEOS at 10,000x magnification. The image shows a porous, layered structure with a rough surface. A scale bar at the bottom indicates 1 μm. Metadata: x10,000, 2.00kV, 1.5SD, SEM, 08-Sep-21, WD 10.0mm.</p>           |  <p>SEM image of TEOS at 50,000x magnification. The image shows individual particles of varying sizes. A scale bar at the bottom indicates 100 nm. Metadata: x50,000, 2.00kV, 1.5SD, SEM, 08-Sep-21, WD 10.0mm.</p>           |
| PEG350-IPTES                    |  <p>SEM image of PEG350-IPTES at 10,000x magnification. The image shows a porous, layered structure with a rough surface. A scale bar at the bottom indicates 1 μm. Metadata: x10,000, 2.00kV, 1.5SD, SEM, 08-Sep-21, WD 10.3mm.</p>  |  <p>SEM image of PEG350-IPTES at 50,000x magnification. The image shows individual particles of varying sizes. A scale bar at the bottom indicates 100 nm. Metadata: x50,000, 2.00kV, 1.5SD, SEM, 08-Sep-21, WD 10.4mm.</p>  |
| PEG500-IPTES                    |  <p>SEM image of PEG500-IPTES at 10,000x magnification. The image shows a porous, layered structure with a rough surface. A scale bar at the bottom indicates 1 μm. Metadata: x10,000, 2.00kV, 1.5SD, SEM, 08-Sep-21, WD 10.2mm.</p> |  <p>SEM image of PEG500-IPTES at 50,000x magnification. The image shows individual particles of varying sizes. A scale bar at the bottom indicates 100 nm. Metadata: x50,000, 2.00kV, 1.5SD, SEM, 08-Sep-21, WD 10.2mm.</p> |
| PEG750-IPTES                    |  <p>SEM image of PEG750-IPTES at 10,000x magnification. The image shows a porous, layered structure with a rough surface. A scale bar at the bottom indicates 1 μm. Metadata: x10,000, 2.00kV, 1.5SD, SEM, 08-Sep-21, WD 10.2mm.</p> |  <p>SEM image of PEG750-IPTES at 50,000x magnification. The image shows individual particles of varying sizes. A scale bar at the bottom indicates 100 nm. Metadata: x50,000, 2.00kV, 1.5SD, SEM, 08-Sep-21, WD 10.2mm.</p> |

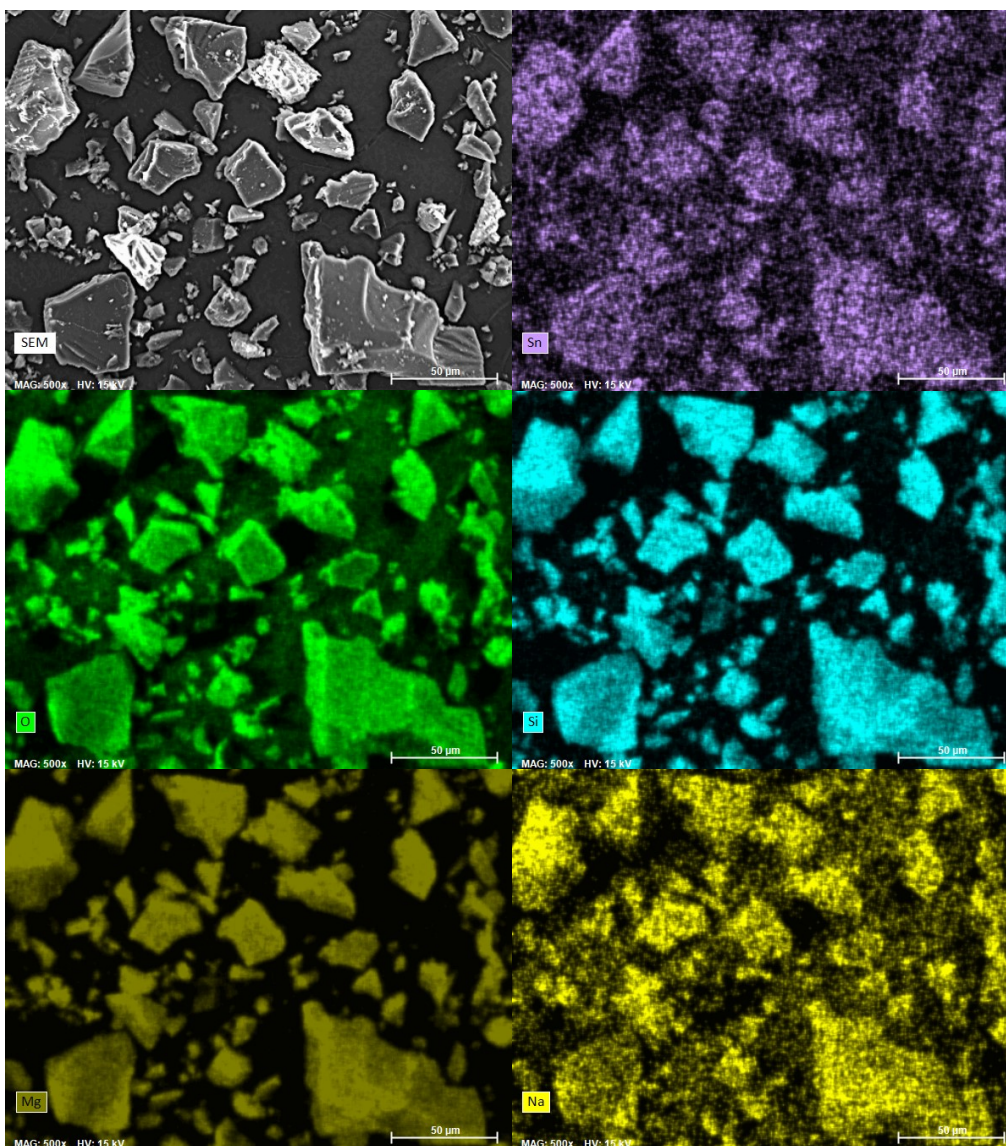

**Figure S1.** Element distribution (Sn, Mg, Si, O, Na) observed by EDX for sample prepared with PEG350-IPTES as silicon source.

**Table S3.** Chemical composition (atomic %) determined by EDX analysis, average of 9 measurements.

| Source of silicon | O     | Na   | Mg    | Al   | Si    | Sn   |
|-------------------|-------|------|-------|------|-------|------|
| TEOS              | 67.88 | 0.35 | 20.44 | 0.04 | 11.29 | 0.00 |
| PEG350-IPTES      | 69.09 | 1.39 | 21.86 | 0.08 | 7.03  | 0.54 |
| PEG500-IPTES      | 66.10 | 1.35 | 23.10 | 0.10 | 9.19  | 0.16 |
| PEG750-IPTES      | 65.28 | 1.21 | 22.27 | 0.09 | 11.04 | 0.11 |

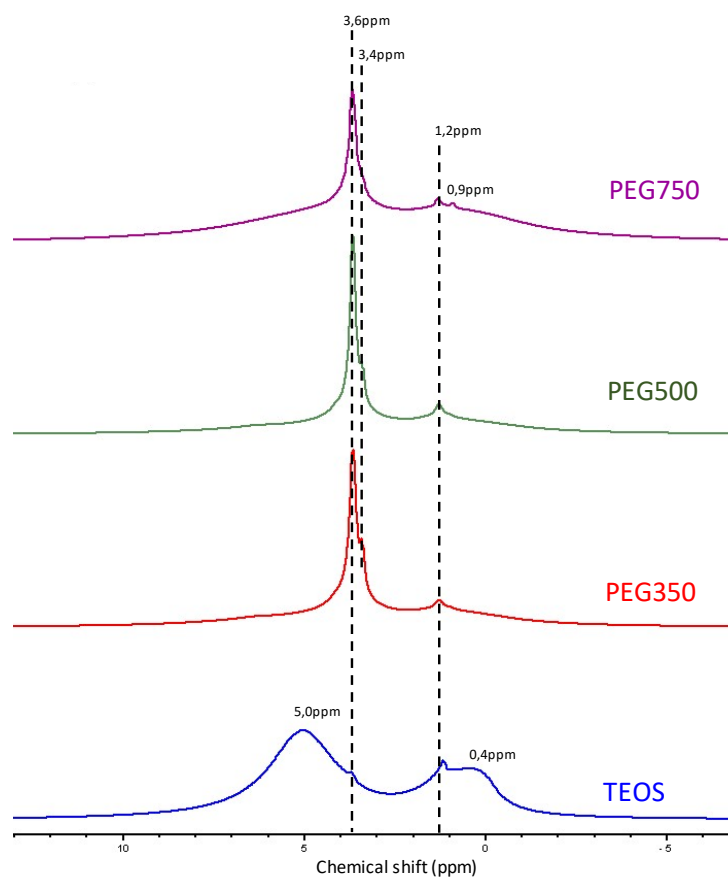

**Figure S2.** Solid state  $^1\text{H}$  MAS NMR spectra of talc-like compounds using TEOS (blue), PEG350-IPTES (red), PEG500-IPTES (green) and PEG750-IPTES (violet) as silicon sources.

The chemical shift of 3.6 ppm corresponds to PEG and “g” protons (see Figure 3 for identification). The chemical shift of 3.4 ppm corresponds to protons “a”. The chemical shift of 1.2 ppm corresponds to protons “h”. The peak around 3.6 ppm is large and there is an overlap of protons related to the PEG structure and  $-\text{CH}_2-$  group from the ethoxy group. The chemical shift at 1.2 ppm allows clearly to distinguish the presence of protons  $-\text{CH}_3$  from the ethoxy group. A peak with chemical shift of 0.9 ppm is visible for the sample with PEG750-IPTES. This chemical shift has been attributed to protons belonging to  $-\text{OH}$  group.
